# Supplementary material for: Inflammatory Serum Protein Profiling of Patients with Lumbar Radicular Pain One Year after Disc Herniation
Source: Hindawi journal article supplement (doi:10.1155/2016/3874964), 2016-01-01
Supplement: f1 [file 3874964.f1.pdf]

Supplementary Table 1

List of the proteins included in this study (Source: www.olinke.com)

| Long name (short name)                                                        | Uniprot | LoD (pg/ml)* |
|-------------------------------------------------------------------------------|---------|--------------|
| Adenosine Deaminase (ADA)                                                     | P00813  | 0.48         |
| Artemin (ARTN)                                                                | Q5T4W7  | 0.24         |
| Axin-1 (AXIN1)                                                                | O15169  | 61           |
| Beta-nerve growth factor (Beta-NGF)                                           | P01138  | 0.48         |
| Brain-derived neurotrophic factor (BDNF)                                      | P23560  | -            |
| Caspase 8 (CASP-8)                                                            | Q14790  | 0.48         |
| C-C motif chemokine 4 (CCL4)                                                  | P13236  | 1.9          |
| C-C motif chemokine 19 (CCL19)                                                | Q99731  | 15           |
| C-C motif chemokine 20 (CCL20)                                                | P78556  | 7.6          |
| C-C motif chemokine 23 (CCL23)                                                | P55773  | 31           |
| C-C motif chemokine 25 (CCL25)                                                | O15444  | 3.8          |
| C-C motif chemokine 28 (CCL28)                                                | Q9NRJ3  | 61           |
| CD40L receptor (CD40)                                                         | P25942  | 0.01         |
| CUB domain-containing protein 1 (CDCP1)                                       | Q9H5V8  | 0.12         |
| C-X-C motif chemokine 1 (CXCL1)                                               | P09341  | 3.8          |
| C-X-C motif chemokine 5 (CXCL5)                                               | P42830  | 0.95         |
| C-X-C motif chemokine 6 (CXCL6)                                               | P80162  | 7.6          |
| C-X-C motif chemokine 9 (CXCL9)                                               | Q07325  | 0.95         |
| C-X-C motif chemokine 10 (CXCL10)                                             | P02778  | 7.6          |
| C-X-C motif chemokine 11 (CXCL11)                                             | O14625  | 7.6          |
| Cystatin D (CST5)                                                             | P28325  | 1.9          |
| Delta and Notch-like epidermal growth factor-related receptor (DNER)          | Q8NFT8  | 0.95         |
| Eotaxin-1 (CCL11)                                                             | P51671  | 3.8          |
| Eukaryotic translation initiation factor 4E-binding protein 1 (4E-BP1)        | Q13541  | -            |
| Fibroblast growth factor 5 (FGF-5)                                            | Q8NF90  | 1.9          |
| Fibroblast growth factor 19 (FGF-19)                                          | Q95750  | 7.6          |
| Fibroblast growth factor 21 (FGF-21)                                          | Q9NSA1  | 31           |
| Fibroblast growth factor 23 (FGF-23)                                          | Q9GZV9  | 122          |
| Fms-related tyrosine kinase 3 ligand (Flt3L)                                  | P49771  | 0.01         |
| Fractalkine (CX3CL1)                                                          | P78423  | 15.3         |
| Glial cell line-derived neurotrophic factor (hGDNF)                           | P39905  | 0.01         |
| Hepatocyte growth factor (HGF)                                                | P14210  | 7.6          |
| Interferon gamma (IFN-gamma)                                                  | P01579  | 15.3         |
| Interleukin-1 alpha (IL-1 alpha)                                              | P01583  | 0.48         |
| Interleukin-2 (IL-2)                                                          | P60568  | 30.5         |
| Interleukin-2 receptor subunit beta (IL-2RB)                                  | P14784  | 15           |
| Interleukin-4 (IL-4)                                                          | P05112  | 0.24         |
| Interleukin-5 (IL-5)                                                          | P05113  | 3.8          |
| Interleukin-6 (IL-6)                                                          | P05231  | 0.12         |
| Interleukin-7 (IL-7)                                                          | P13232  | 0.24         |
| Interleukin-8 (IL-8)                                                          | P10145  | 0.03         |
| Interleukin-10 (IL-10)                                                        | P22301  | 0.48         |
| Interleukin-10 receptor subunit alpha (IL-10RA)                               | Q13651  | 3.8          |
| Interleukin-10 receptor subunit beta (IL-10RB)                                | Q08334  | 0.12         |
| Interleukin-12 subunit beta (IL-12B)                                          | P29460  | 0.12         |
| Interleukin-13 (IL-13)                                                        | P35225  | 7.6          |
| Interleukin-15 receptor subunit alpha (IL-15RA)                               | Q13261  | 0.95         |
| Interleukin-17A (IL-17A)                                                      | Q16552  | 3.8          |
| Interleukin-17C (IL-17C)                                                      | Q9P0M4  | 31           |
| Interleukin-18 (IL-18)                                                        | Q14116  | 0.06         |
| Interleukin-18 receptor 1 (IL-18R1)                                           | Q13478  | 0.06         |
| Interleukin-20 (IL-20)                                                        | Q9NYY1  | 7.6          |
| Interleukin-20 receptor subunit alpha (IL-20RA)                               | Q9UHF4  | 1.9          |
| Interleukin-22 receptor subunit alpha-1 (IL-22 RA1)                           | Q8N6P7  | 0.24         |
| Interleukin-24 (IL-24)                                                        | Q13007  | 1.9          |
| Interleukin-33 (IL-33)                                                        | O95760  | 3.8          |
| Latency-associated peptide transforming growth factor beta 1 (LAP TGF-beta-1) | P01137  | 61           |
| Leukemia inhibitory factor (LIF)                                              | P15018  | 3.8          |
| Leukemia inhibitory factor receptor (LIF-R)                                   | P42702  | 30.5         |
| Macrophage colony-stimulating factor 1 (CSF-1)                                | P09603  | 0.004        |
| Macrophage inflammatory protein 1-alpha (MIP-1 alpha)                         | P10147  | 0.06         |
| Matrix metalloproteinase-1 (MMP-1)                                            | P03956  | 1.9          |
| Matrix metalloproteinase-10 (MMP-10)                                          | P09238  | 0.95         |
| Monocyte chemoattractant protein 1 (MCP-1)                                    | P13500  | 0.03         |
| Monocyte chemoattractant protein 2 (MCP-2)                                    | P80075  | 0.06         |
| Monocyte chemoattractant protein 3 (MCP-3)                                    | P80098  | 0.48         |
| Monocyte chemoattractant protein 4 (MCP-4)                                    | Q99616  | 7.6          |
| Natural killer cell receptor 2B4 (CD244)                                      | Q9BZW8  | 0.06         |
| Neurotrophin-3 (NT-3)                                                         | P20783  | 0.12         |
| Neurturin (NRTN)                                                              | Q99748  | 3.8          |
| Oncostatin-M (OSM)                                                            | P13725  | 0.03         |
| Osteoprotegerin (OPG)                                                         | O00300  | 0.24         |
| Programmed cell death 1 ligand 1 (PD-L1)                                      | Q9NZQ7  | 3.8          |
| Protein S100-A12 (EN-RAGE)                                                    | P80511  | 122          |
| Signaling lymphocytic activation molecule (SLAMF1)                            | Q13291  | 31           |
| SIR2-like protein 2 (SIRT2)                                                   | Q8IXJ6  | 7.6          |
| STAM-binding protein (STAMPB)                                                 | O95630  | 7.6          |
| Stem cell factor (SCF)                                                        | P21583  | 1.9          |
| Sulfotransferase 1A1 (ST1A1)                                                  | P50225  | 244          |
| T cell surface glycoprotein CD6 isoform (CD6)                                 | Q8WWJ7  | 0.06         |
| T-cell surface glycoprotein CD5 (CD5)                                         | P06127  | 0.06         |
| Thymic stromal lymphopoietin (TSLP)                                           | Q96909  | 3.8          |
| TNF-beta (TNFB)                                                               | P01374  | 0.24         |
| TNF-related activation-induced cytokine (TRANCE)                              | O14788  | 3.8          |
| TNF-related apoptosis-inducing ligand (TRAIL)                                 | P50591  | 0.95         |
| Transforming growth factor alpha (TGF-alpha)                                  | P01135  | 0.48         |
| Tumor necrosis factor (Ligand) superfamily, member 12 (TWEAK)                 | Q4ACW9  | 1.9          |
| Tumor necrosis factor (TNF)                                                   | P01375  | 0.48         |
| Tumor necrosis factor ligand superfamily member 14 (TNFSF14)                  | O43557  | 0.95         |
| Tumor necrosis factor receptor superfamily member 9 (TNFRSF9)                 | Q07011  | 0.03         |
| Urokinase-type plasminogen activator (uPA)                                    | P00749  | 0.12         |
| Vascular endothelial growth factor A (VEGF-A)                                 | P15692  | 0.06         |

\*Limit of detection (LoD) defined as 3 standard deviations above background
